1           **A dynamic cell recruitment process drives**  
2           **growth of the *Drosophila* wing by overscaling**  
3           **the *Vestigial* expression pattern**

4  
5           Luis Manuel Muñoz-Nava<sup>1</sup>, Hugo Ariel Alvarez<sup>2,3</sup>, Marycruz  
6           Flores-Flores<sup>1</sup>, Osvaldo Chara<sup>2,4</sup> and Marcos Nahmad<sup>1,\*</sup>

7  
8           <sup>1</sup>Department of Physiology, Biophysics, and Neurosciences; Centre for  
9           Research and Advanced Studies of the National Polytechnical Institute  
10           (Cinvestav-IPN); Mexico City, 07360; MEXICO

11  
12           <sup>2</sup>Systems Biology Group (SysBio), Institute of Physics of Liquids and  
13           Biological Systems (IFLYSIB); National Scientific and Technical Research  
14           Council (CONICET) and University of La Plata (UNLP); La Plata,  
15           B1900BTE; ARGENTINA

16  
17           <sup>3</sup>Department of Biological Sciences, Faculty of Exact Sciences, University of  
18           La Plata (UNLP); La Plata, 1900, Buenos Aires, ARGENTINA

19  
20           <sup>4</sup>Center for Information Services and High Performance Computing (ZIH);  
21           Technische Universität Dresden (TUD); Dresden, 01069; GERMANY

22  
23           \* Corresponding author's email address: [mnahmad@fisio.cinvestav.mx](mailto:mnahmad@fisio.cinvestav.mx)

24  
25  
26           **Running title:** Cell recruitment drives growth

27  
28           **Key words:** Organ growth; patterning; *vestigial*; cell recruitment; scaling;  
29           *Drosophila* wing disc.

1 **Summary statement**

2

3 Cell recruitment enhances growth of the developing *Drosophila* wing by expanding the expression  
4 of the wing selector gene, *vestigial*.

5

6 **Abstract**

7

8 Organs mainly attain their size by cell growth and proliferation, but sometimes also grow through  
9 recruitment of undifferentiated cells. Here we investigate the participation of cell recruitment in  
10 establishing the pattern of Vestigial (Vg), the product of the wing selector gene in *Drosophila*. We  
11 find that the Vg pattern overscales along the dorsal-ventral (DV) axis of the wing imaginal disc, *i.e.*,  
12 it expands faster than the DV length of the pouch. This overscaling cannot be explained by  
13 differential proliferation or apoptosis, nor correlates with the dynamics of the Wingless gradient,  
14 which orchestrates patterning along the DV axis. We show that Vg overscaling is recapitulated by a  
15 mathematical model that explicitly considers cell recruitment. Experimentally, when cell  
16 recruitment is genetically impaired, the Vg pattern almost perfectly scales and adult wings are 20%  
17 smaller, demonstrating that cell recruitment contributes to organ growth. Furthermore, using  
18 lineage-tracing tools, we find that cell recruitment takes place in a specific time during normal  
19 development. Altogether, our work quantitatively shows when, how, and by how much cell  
20 recruitment shapes the Vg pattern and drives growth of the *Drosophila* wing.

21

22

23

24

25

26

27

28

## 1 Introduction

2

3 Organ growth during development is orchestrated by morphogens, which are signaling molecules  
4 that determine gene expression in a non-cell autonomous manner and also act as mitogens (Day and  
5 Lawrence, 2000; Schwank and Basler, 2010; Dekanty and Milán, 2011; Lander, 2011; Wartlick *et*  
6 *al.*, 2011; Bryant and Gardiner, 2016; Vollmer *et al.*, 2017). However, growth may also be driven  
7 independently of morphogen-induced cell proliferation, by a growth-by-patterning mechanism in  
8 which a differentiation pattern expands at the expense of the incorporation of undifferentiated cells.  
9 This mechanism, also known as inductive assimilation or cell recruitment, has been reported to  
10 work in both vertebrate and invertebrate development such as in the eye (Heberlein *et al.*, 1995;  
11 Strutt *et al.*, 1995) and wing discs (Baena-López and García-Bellido, 2003; Zecca and Struhl,  
12 2007a) of the fruit fly, *Drosophila melanogaster*, as well as in the mammalian thyroid (Fagman *et*  
13 *al.*, 2006) and kidney (Lindström *et al.*, 2018). Little is known, however, about the dynamic  
14 properties of patterning by cell recruitment and how much organ growth can be gained through cell  
15 recruitment relative to cell growth and proliferation. These questions are generally difficult to  
16 address during normal development because the dynamics of patterning and cell proliferation occur  
17 simultaneously and it is challenging to isolate the contribution of each of these mechanisms to organ  
18 size. The *Drosophila* wing imaginal disc is a useful system to tackle this problem since previous  
19 studies have partly identified the molecular players of recruitment (Zecca and Struhl, 2007a; Zecca  
20 and Struhl, 2010) and genetic tools allow manipulation and quantitative assessment of patterning  
21 and growth (Hariharan and Bilder, 2006; Beira and Paro, 2016).

22 In *Drosophila*, wing fate is determined by the expression of the wing selector gene, *vestigial*  
23 (*vg*), in the pouch of the wing imaginal disc (Williams *et al.*, 1991). The absence of *vg* results in  
24 loss of wing blade identity (Williams *et al.*, 1991; Williams *et al.*, 1993), whereas ectopic  
25 expression of *vg* in other imaginal discs could induce transformation into wing-like tissue (Williams  
26 *et al.*, 1994; Kim *et al.*, 1996; Halder *et al.*, 1998; Baena-López and García-Bellido, 2003).  
27 Therefore, adult wing size depends on the size and shape of the Vg pattern established during the  
28 larval stage.

29 *vg* expression is controlled at least by two enhancers, the *vg* boundary enhancer (*vg*<sup>BE</sup>) that  
30 responds to Notch signaling and results in high expression of Vg at the dorsal-ventral (DV)  
31 boundary (Irvine and Vogt, 1997), and the *vg* quadrant enhancer (*vg*<sup>QE</sup>) that is partly activated by  
32 the Wingless (Wg) morphogen (Kim *et al.*, 1996; Zecca and Struhl, 2007b) resulting in a gradient of

1 Vg along the DV axis (Baena-López and García-Bellido, 2006). The lineage of cells abutting the  
2 DV boundary can maintain their transcriptional expression of *vg* through Polycomb/Trithorax  
3 Responsive Elements (Pérez *et al.*, 2011). The *vg<sup>OE</sup>* is the responsive element of a cell recruitment  
4 process that depends on a feed-forward signal sent by Vg-expressing cells to non-expressing cells  
5 (Zecca and Struhl, 2007a). In 2010, Zecca and Struhl identified the following molecular details of  
6 the recruitment process (Zecca and Struhl, 2010): (1) Vg-expressing cells transcriptionally repress  
7 the protocadherin *dachsous* (*ds*), resulting in complementary patterns of Vg and Ds expression; (2)  
8 the boundary of the Vg/Ds expression domains facilitates Fat-Ds polarization, and (3) the  
9 polarization signaling induces nuclear shuttling of Yorkie (Yki), the transcriptional factor  
10 downstream of the Warts-Hippo tumor suppressor pathway, where it promotes *vg* expression  
11 transcriptionally. This process results in a new Vg-expressing cell, thus propagating the Vg pattern.  
12 As new cells are recruited into the Vg domain, the Ds pattern is pushed outwards radially by Vg-  
13 dependent transcriptional repression from the center of the wing pouch.

14 While previous studies have provided experimental evidence of the recruitment process by  
15 showing that Vg-expressing mosaics can induce expression of a *vg<sup>OE</sup>* reporter non-cell-  
16 autonomously (Zecca and Struhl, 2007a; Zecca and Struhl, 2010), the contribution of cell  
17 recruitment to wild-type patterning and growth of the wing disc has not yet been investigated. Here,  
18 we precisely address this question by quantitatively examining the temporal dynamics of the Vg  
19 gradient and asking if these can be explained by a cell recruitment mechanism. We show that cell  
20 recruitment affects the shape of the Vg pattern and contributes to final size of the adult *Drosophila*  
21 wing.

22

## 23 **Results**

### 24 *The Vg pattern overscales with respect to disc size along the DV axis*

25 In order to investigate how the Vg pattern changes as a function of tissue size, we quantified Vg  
26 expression in wild-type wing discs during the third larval instar (85-120 h After Egg Laying (AEL))  
27 at 25°C) as a function of DV position in a central region of the pouch delimited by the dorsal and  
28 ventral epithelial folds (Fig. 1A; Fig. S1). These folds robustly appear in the disc at about 85 h AEL  
29 at 25°C (Sui *et al.*, 2012) and serve as references to define the length of the DV axis within the  
30 pouch area (Fig. 1A). To determine how the Vg pattern changes in discs of different sizes, we  
31 subdivided the discs into 4 groups according to their DV length, which is correlated with disc age  
32 (Fig. 1B, Fig. S2). Representative discs of each group stained for Vg and DAPI are shown in Figure

1 1C-F. Since fluorescence levels drop close to the folds due to tissue geometry (Fig. 1C''- F''), we  
2 used normalized DAPI levels to correct Vg expression (see Supplementary Information). After  
3 DAPI correction, Vg is expressed in a concentration gradient with maximum levels around the DV  
4 border and decreasing towards the ventral and dorsal folds in all groups (Fig. 1C'''- F'''). However,  
5 when we plotted the average of the normalized Vg patterns of each group in relative units (*i.e.*, % of  
6 DV length), we observed clear differences in Vg patterns among the groups (Fig. 1G). First, we  
7 noticed that the relative width at half maximum of the Vg gradient (width to DV length ratio) on  
8 average increases when plotted vs. DV length (Fig. 1H, Fig. S3). Note that this result is independent  
9 of how the discs were grouped and indicates that the Vg gradient overscales with respect to disc  
10 size, *i.e.*, that the Vg pattern expands further than what would be expected by uniform growth of the  
11 disc along the DV axis. Second, the Vg gradient also experiences shape changes between groups;  
12 particularly, we noticed that the slopes at the tails of the Vg gradient between groups 3 and 4  
13 decrease, suggesting that Vg levels significantly increase in cells located at the edges of the wing  
14 pouch during the late third instar (Fig. S4). Finally, we noticed a ventral shift of the relative position  
15 of Vg maximum between groups 2 and 3 (Fig. 1I); this shift suggests that the dorsal compartment  
16 grows more than the ventral compartment during this time. In summary, we found that during  
17 normal development, the scale, shape, and symmetry of the Vg gradient changes with respect to  
18 disc size along the DV axis.

19

#### 20 *Vg overscaling cannot be accounted by the dynamics of the Wg morphogen*

21 Since Vg expression along the DV axis depends on Wg signaling, we asked if the Vg overscaling  
22 along the DV axis is a direct consequence of a similar overexpansion of the Wg morphogen  
23 gradient. Thus, we also examined the absolute width of the Wg gradient in wing discs of different  
24 ages/sizes (Fig. 2A-D) and found that it nearly remains unchanged with respect to changes in DV  
25 length (Fig. 2E). In fact, when we plotted the relative width as a function of DV length, we found a  
26 negative correlation, *i.e.*, the Wg pattern underscales with respect to DV length (Fig. 2F, Fig. S3).  
27 Hence, we conclude that the spatial dynamics of the Wg morphogen does not explain the  
28 overscaling of the Vg pattern.

29

#### 30 *Vg overscaling cannot be explained by differential cell proliferation or apoptosis*

31 Another plausible explanation of the overscaled Vg pattern is that there is a difference in cell  
32 proliferation or apoptosis between Vg-expressing vs. non-Vg expressing cells. For example, cells

1 near the edge of the pouch may be experiencing higher apoptosis rates or Vg-expressing cells may  
2 proliferate faster than cells outside of the Vg domain, resulting in an overscaling Vg pattern. To test  
3 these possibilities, we first examined the expression of the pro-apoptotic marker Caspase 3 (Cas 3)  
4 throughout development and found that apoptosis occurs at low frequency and seems to be  
5 homogeneous in the wing pouch (Fig. S5); this is consistent with a previous study (Milán *et al.*,  
6 1997). Second, we examined cell proliferation and also confirmed the previously known result that  
7 during most of the third instar cell proliferation within the pouch is approximately uniform, except  
8 for cells at the DV boundary (Fig. S6A; Schwank *et al.*, 2011; Wartlick *et al.*, 2011; Mao *et al.*,  
9 2013). We conclude that the overscaling of the Vg gradient cannot be accounted by differences in  
10 cell proliferation or apoptosis between cells within and outside the Vg domain.

11

### 12 *Mathematical modeling of cell recruitment predicts the overscaling of the Vg patterns*

13 In order to investigate if the dynamics of the Vg gradient could be accounted by a cell recruitment  
14 mechanism, we modeled the distribution of Vg in the wing pouch by means of a multi-scale model  
15 (see Supplementary Information for full description). The model combines an ordinary differential  
16 equation to account for the rate of change of Vg concentration in each cell ( $Vg^i$ ) with a 2D Cellular  
17 Potts Model (CPM; Graner and Glazier, 1992; Glazier and Graner, 1993) describing the cellular  
18 dynamics (Fig. 3A and Fig. S7A, B). We assumed that cells produce Vg by two mechanisms, while  
19 there is only one sink modeled as a linear degradation. The first production term assumes that Vg  
20 expression responds to the concentration of a given non-scaling morphogen (e.g., Wg; Fig. 3A and  
21 Supplementary Information). The second cellular source of Vg is our quantitative formulation of the  
22 recruitment mechanism. In particular, we proposed that this production term depends on the  
23 difference in Vg concentration between the actual cell and the average of the concentration of its  
24 neighbors by a second order Hill function (Fig. 3A and Fig. S7C). Hence, this production term  
25 becomes relevant when the concentration of the cell is different from the one of its neighbors and  
26 negligible when they are similar. As a control, we also considered a model without the recruitment  
27 term. To account for disc growth, we explicitly included homogeneous cell proliferation in which  
28 the cell cycle parameters were fitted to the average number of cells in each of the four groups  
29 defined in Fig. 1B (Fig. S8 and Supplementary Information). Schematics of the simulated Vg  
30 expression patterns corresponding to each of the groups are shown in Fig. 3B-E (without cell  
31 recruitment) and 3B'-E' (with cell recruitment).

32

1 We examined whether the models (with and without the recruitment term) could explain the  
2 spatiotemporal expansion of Vg shown in Fig. 1 by a fitting procedure where we varied the  
3 parameter values of each of the models and minimized a target function of the residuals between  
4 experimental and simulated Vg expression data. (For simplicity, we did not take into account  
5 differences between dorsal and ventral compartments, so we only compared experimental and  
6 simulated data in the dorsal compartment; Fig. S9). The best-fit simulation of the model with  
7 recruitment reasonably recapitulates the experimental overscaling in each of the four groups (Fig.  
8 3B''-E'', blue line vs. black line; Fig. S10; Video S1; Supplemental Information) and the minimum  
9 of the target function is clearly identified within the parameter space (Fig. S11A-D, blue dots,  
10 minimum marked with a green circle). In contrast, the best-fit solution of the model without the  
11 recruitment term does not reproduce the experimental data (Fig. 3B''-E'', blue line vs. black line;  
12 Video S1). We conclude that a model encoding a mechanism of cell recruitment can explain the  
13 overscaling dynamics of the Vg gradient.

14

15 *Blocking Vg expression in ds-expressing cells disrupts the overscaling of the Vg gradient and*  
16 *nearly results in perfect scaling*

17 To verify the predictions of our mathematical model, we expressed an interference RNA for *vg*  
18 ( $vg^{RNAi}$ ) under *ds* control ( $ds > vg^{RNAi}$ ) using the Drosophila Gal4-UAS system (Brand and Perrimon,  
19 1993; Fig. S12A). Since cell recruitment works by expanding Vg expression in *ds*-expressing cells  
20 (Zecca and Struhl, 2010), we expect cell recruitment will be blocked in  $ds > vg^{RNAi}$  discs. Moreover,  
21 if cell recruitment is indeed responsible for the overscaling of the Vg gradient *in vivo*, we predict  
22 that overscaling phenotype will be lost in  $ds > vg^{RNAi}$  discs. We sorted the discs into four groups  
23 according to their DV length (Fig. S12B) and quantified the patterns of Vg as we did for the wild-  
24 type discs (Fig. 4A-D). As predicted, on average the overscaling property of the Vg pattern is  
25 mostly lost (Fig. 4E, compare to Fig. 1G). Although there is a small, but positive slope when we  
26 plotted the relative width of the Vg pattern vs. DV length in these discs (Fig. 4F), this could be  
27 attributed to the fact that  $vg^{RNAi}$  expression is not in a full knock-out of Vg-dependent recruitment.  
28 We considered if the loss of Vg overscaling in  $ds > vg^{RNAi}$  discs could result from an alternative  
29 mechanism. For example,  $ds > vg^{RNAi}$  discs may experience higher cell proliferation or lower  
30 apoptosis rates at the edges of the pouch due to cell competition or changes in the slope of the  
31 gradient (Baéna-Lopez and García-Bellido, 2006). However, we found that cell proliferation and  
32 apoptosis patterns are very similar in control and  $ds > vg^{RNAi}$  discs (Fig. S6). We conclude that



1 preventing Vg expression in the *ds* expression domain blocks the recruitment-dependent  
2 overexpansion of the Vg gradient.

3

#### 4 *A time-dependent cell recruitment process contributes to the Vg pattern during normal development*

5 In order to investigate more directly the dynamics of the cell recruitment process during normal  
6 development, we used a temperature-sensitive Gal80 (Zeidler *et al.*, 2004) to selectively mark the  
7 lineage of the cells that express *vg* through the  $vg^{OE}$  ( $vg^{OE}$  lineage) and compared it to Vg-  
8 expressing cells. We reasoned that if marking of the  $vg^{OE}$  lineage is restricted to a specific period of  
9 time during development, a cell expressing Vg and not marked by the  $vg^{OE}$  lineage will be either a  
10 cell arising from the  $vg^{BE}$  or a newly recruited cell. When we kept  $vg^{OE}$  lineage tracing  
11 constitutively active throughout development (29 °C), as expected, nearly the whole  $vg^{OE}$  pattern is  
12 recovered (Fig. 5A-A'''). We then marked the  $vg^{OE}$  lineage from the beginning of development (29  
13 °C) and then switched it off (transferring the animals to 18 °C) for 48 h (Fig. 5B-D). When we  
14 examined young third-instar discs (*i.e.* temperature switching during late second-instar / early third-  
15 instar development), no  $vg^{OE}$  lineage is marked (Fig. 5B-B'''). In contrast, when late third-instar  
16 discs were examined (*i.e.* temperature switching at mid third-instar), the  $vg^{OE}$  lineage covers the  
17 whole  $vg^{OE}$  pattern, suggesting that recruitment was already committed before this period (Fig. 5D-  
18 D'''; compare to Fig. 5A-A'''). However, when mid-to-late instar discs were examined (*i.e.*  
19 temperature switching at early-to-mid third-instar), a clear population of Vg-expressing cells at the  
20 periphery of the disc that are not within the  $vg^{OE}$  lineage can be detected (Fig. 5C-C'''). These data  
21 directly reveal that during normal wing disc development, cell recruitment takes place at a specific  
22 period of time between early and mid third-larval instar.

23

#### 24 *Impairment of cell recruitment results in smaller, but well-proportioned adult wings*

25 We then asked whether cell recruitment could have an effect on adult wing size. Therefore, we  
26 compared  $ds > vg^{RNAi}$  vs. control adult wings (Fig. 6). Most adult wings of  $ds > vg^{RNAi}$  animals show  
27 the normal vein patterns (Fig. 6A-B). However,  $ds > vg^{RNAi}$  wings are on average smaller than control  
28 wings (Fig. 6C). We assume that cell recruitment takes place in dorsal- and ventral-most regions of  
29 the wing pouch, which correspond to proximal regions of the adult wing. Therefore, we predicted  
30 that  $ds > vg^{RNAi}$  adult wings would be smaller in proximal regions, but unaffected in distal regions.  
31 However, we found that representative areas of both proximal (Fig. 6D, inset) and distal (Fig. 6E,



1 inset) regions of the adult wing are similarly reduced in  $ds>vg^{RNAi}$  animals (17 and 21 %,  
2 respectively; Fig. 6D-E). Furthermore, we found that  $ds>vg^{RNAi}$  wings maintain their proximal-distal  
3 (longitudinal) to anterior-posterior (transversal) proportions, as the ratio of longitudinal to  
4 transversal dimensions is not statistically different between control and mutant adult wings (Fig.  
5 6F). Taken together, we conclude that the impairment of cell recruitment in  $ds>vg^{RNAi}$  animals  
6 significantly affects adult wing size but not its proportions.

7

## 8 **Discussion**

9

10 How gene expression patterns that determine cell fate are established and contribute to organ size  
11 are important questions in developmental biology. There are two predominant models by which  
12 gene expression patterns are coordinated with organ growth. In the first model, patterns  
13 continuously depend on morphogen signaling; when the morphogen gradient changes, the patterns  
14 also change accordingly. In particular, if the morphogen scales to organ size, the patterns that  
15 depend on the morphogen would maintain their proportions relative to the final size. In the second  
16 model, a morphogen gradient establishes pre-patterns of gene expression that are then locked by  
17 positive feedback regulation. Once cells are locked in a determined fate, the final patterns are no  
18 longer dependent on the morphogen but are determined by organ growth. Particularly, when growth  
19 is uniform, this results in patterns that scale with size throughout development. In both of these  
20 models, the patterning process adjust to organ growth and the final patterns are invariant to organ  
21 size. Our data on patterning of the wing selector gene, *vg*, in the *Drosophila* wing disc support an  
22 additional conceptual model. After being established by Notch and *Wg* signaling, *Vg* expression is  
23 maintained through cell divisions by a mechanism involving Polycomb/Trithorax Responsive  
24 Elements. In a tissue that grows uniformly like the wing disc, this would result in a pattern that  
25 scales with tissue size. However, we find that the *Vg* gradient overscales relative to DV axis length  
26 (Fig. 1). This is not due to overscaling of *Wg*, since this morphogen actually underscales (Fig. 2),  
27 and cannot be explained by non-uniform cell proliferation or apoptosis (Figs S5, S6). Instead, our  
28 modeling results suggest that *Vg* overscaling could be explained by a cell recruitment mechanism  
29 (Fig. 3). In fact, when cell recruitment is genetically blocked, the overscaling phenotype is mostly  
30 lost (Fig. 4). We provide direct evidence of the cell recruitment dynamics during *Vg* patterning  
31 (Fig. 5). Finally, we show that cell recruitment contributes to about 20 % of adult wing size (Fig. 6).

1           Based on qualitative evidence on Vg expansion in genetic mosaics, Zecca and Struhl  
2 identified the molecular mechanisms of recruitment and proposed that Vg-dependent cell  
3 recruitment could contribute to growth of the *Drosophila* wing disc (Zecca and Struhl, 2007a; Zecca  
4 and Struhl 2010). However, it remained unclear when and to what extent cell recruitment actually  
5 contributes to normal patterning and growth of the disc. Our study directly shows that cell  
6 recruitment works by overexpanding the endogenous pattern of a selector gene, thus contributing to  
7 both patterning and organ growth. To our knowledge, this is the first study where recruited cells are  
8 directly detected during wild-type development and where its contributions to pattern formation and  
9 organ growth are quantitatively determined.

10           Wg signaling is absolutely required for Vg expression and propagation along the DV axis  
11 (Zecca and Struhl, 2007a). But Wg signaling is broader in early discs and then narrows (Fig. 2),  
12 which is quite opposite of the Vg overscaling dynamics here reported (Fig. 1). How can these  
13 observations be conciliated? We think that *vg* expression depends on memory of earlier, pouch-  
14 wide Wg signaling activity (Alexandre *et al.*, 2014), but Wg signaling do not play a leading role in  
15 the overscaling of Vg dynamics.

16           In this study, we focused on Vg patterning along the DV axis, but other signaling pathways  
17 participate in Vg expression. For example, Decapentaplegic (Dpp), a member of the BMP family,  
18 patterns the disc along the anterior-posterior (AP) axis and has been proposed an input signaling for  
19 *vg* expression (Kim *et al.*, 1996). How Dpp signaling contributes or limits cell recruitment along the  
20 AP axis and participates in the 2-dimensional Vg pattern is left to future work.

21           Our lineage-tracing experiments show that cells that do not come from the *vg*<sup>OE</sup> lineage  
22 could acquire Vg expression, *i.e.* new cells get recruited, and reveal the spatiotemporal dynamics of  
23 this recruitment process (Fig. 5). We interpret these dynamics as a two-step recruitment process:  
24 The first step takes place between early and mid third-instar, and results in the overscaling of the Vg  
25 gradient width. This expansion is captured by the Vg patterns in wild-type discs (Fig. 1G,H) and is  
26 mostly lacking in *ds>vg*<sup>RNAi</sup> discs (Fig. 4E,F). The fact that this step occurs during a narrow  
27 window of time (Fig. 5), suggests that the Ft-Ds polarization signal can propagate several cells  
28 without the need of a cell-by-cell expansion of Vg expression, *i.e.* several layers of cells could begin  
29 to be recruited at once (Wortman *et al.* 2017). The second step extends from mid to late third-larval  
30 instar (about 24 hours at 25 °C) and results in increasing levels of Vg at the tails of the gradient.  
31 This is captured by a decrease in the slopes of the Vg gradient in our timecourse examination of  
32 wild-type Vg patterns (Fig. 1G and Fig. S4). The fact that the slopes at the tails of the Vg gradient  
33 never completely flatten suggests that the rates of Vg upregulation are position-dependent, possibly

1 dictated by the strength of the Ft-Ds polarization which decays from its source near the DV  
2 boundary towards ventral- and dorsal-most positions. This two-step model of cell recruitment  
3 suggests that the spatial range of the process is limited by the length-scale of the Ft-Ds polarization  
4 signal.

5 We show that cell recruitment contributes to approximately one fifth of the total adult wing  
6 size (Fig. 6C). An interesting question that remains is to understand the purpose of cell recruitment  
7 as a growth mechanism. In other words, what is the advantage of this developmental design over  
8 simply adjusting cell sizes or cell proliferation rates to achieve a target final size? It is possible that  
9 cell recruitment plays a role in conferring some sort of robustness to developmental growth control.  
10 For example, perhaps recruitment compensates for variations in cell proliferation and could explain  
11 why final wing disc size is robust to perturbations against cell proliferation rates or cell size (Day  
12 and Lawrence, 2000).

13 Recent studies have showed that a cell recruitment mechanism is present in early thyroid  
14 and kidney development in mammals (Fagman et al. 2006; Lindström et al. 2018), but it is unclear  
15 how much recruitment contributes to organ growth or what are the molecular players of the  
16 recruitment signal in these contexts. Given the widespread conservation of the recruitment signal  
17 components that operate in the *Drosophila* wing, it would be interesting to explore whether the  
18 homologous cell recruitment signal operates as a growth-by patterning mechanism in other  
19 developing organs.

20

## 21 **Materials and Methods**

### 22 *Fly stocks and genetics*

23 The following stocks of *Drosophila melanogaster* were used: *y, w* provided by Fanis Missirlis  
24 (Cinvestav, Mexico); Act5C(FRT.polyA)lacZ.nls (Bloomington Drosophila Stock Center, BDSC  
25 #51308); UAS-FLP (BDSC #8209); dppGal4 (BDSC #1553); UAS-hid ((BDSC #65403); UAS-  
26 vg<sup>RNAi</sup> (Vienna Drosophila Resource Center # 16896); ds-Gal4, UAS-GFP (II) provided by Gary  
27 Struhl (Columbia University, New York, USA); vgMQ-Gal4 (II) (BDSC #8229); tubP-Gal80[ts]  
28 (II) (BDSC # 7108). All flies were grown on standard fly medium at 18°C, 25 °C or 29°C,  
29 depending on the experiment. Imaginal discs were dissected from third-instar larvae of both sexes.  
30 For normal endogenous Vg and Wg patterns quantification, the *y, w* stock was used as wild-type  
31 flies (Figs 1 and 2) and kept at 25°C during egg laid and development. For recruitment impairment  
32 (Figs 4 and 6), Gal4 driver under the promoter of *dachsous* (*ds*) gene (ds-Gal4) was used and

1 combined with UAS-vg<sup>RNAi</sup> (for recruitment inhibition) and with the *y, w* stock (control) and were  
2 kept at 25°C during egg laid and then changed to 29°C during development to increase Gal4 system  
3 efficiency. For lineage tracing of no recruited cells (Fig. 5), in vg<sup>QE</sup> expressing cells a FRT STOP  
4 cassette was removed to express LacZ marker using the FLP-FRT, Gal4 and the Gal80<sup>ts</sup>  
5 (temperature-sensitive) systems (see Fig. 5 for genotype).

6

### 7 *Immunostaining*

8 After dissection in a stereoscopic microscope (Nikon SMZ800), discs were fixed in PEM-T (PEM  
9 with 0.1% of Triton X-100) with 4% paraformaldehyde, washed 3 times and blocked in PEM-T  
10 with 0.5% of BSA (Bovine Serum Albumin) for 2 hours at room temperature. Then, samples were  
11 stained with primary antibodies at 4°C overnight at the following dilutions: rabbit anti-Vg (a gift  
12 from Sean Carroll, 1:200), mouse anti-Wg (DSHB, Cat# 4D4, 1:100) and mouse anti-βGal  
13 (Promega Cat# Z378A, RRID:AB\_2313752, 1:1000) and rabbit anti-Caspase 3 (Cell Signaling  
14 Technology, Cat# 9661, 1:200). DAPI (1:1000) was used to stain nuclei. 5-ethynyl-2'-deoxyuridine  
15 (EdU) labeling was performed using the Click-iT EdU Alexa Fluor 647 Imaging Kit (Invitrogen  
16 Cat#C10340) following manufacturer instructions. Primary antibodies were detected with Alexa  
17 Fluor 488 anti-mouse and 647 anti-rabbit (1:1000). Imaging was done with a confocal microscope  
18 (Leica TCS SP8 Confocal Microscope) using a 63X oil-immersion objective.

19

### 20 *Wing mounting*

21 Adult flies were dehydrated overnight in 70% ethanol and then separated by gender. Wings were  
22 dissected in 50% ethanol. The isolated wings were mounted and dried in a plate at 60 °C. Imaging  
23 of adult wings was done using a bright-field microscope (Nikon eclipse Ci-L/Ci-S) using a 4X  
24 objective. Wings were dissected from female and male flies and were independently analyzed.

25

### 26 *Quantification and Statistical Analysis*

27 The details about the quantification of Vg (Figs 1 and 4) and Wg (Fig. 2) are provided in the  
28 Supplementary Information. All the quantifications were performed using Python 3 programming  
29 language (<https://www.python.org/download/releases/3.0/>). The Python packages used for  
30 quantification and statistics were NumPy (<http://www.numpy.org/>), pandas

1 (<https://pandas.pydata.org/>), and SciPy (<https://www.scipy.org/>). The statistical methods used were  
2 T-test or Mann-Whitney test for comparing pairs of parametric or non-parametric datasets,  
3 respectively, and Kruskal-Wallis for more than two non-parametric datasets.

4

#### 5 *Wing disc and adult wing quantification*

6 Vg and Wg pattern in the wing disc were quantified as explained in Fig. S1.  $\beta$ Gal quantification  
7 were made the same way but with the initial position in the DV boundary to the ventral fold (final  
8 position). Wing representative distances and areas were quantified using the straight line and  
9 polygon selection tools respectively in ImageJ/Fiji software (<https://imagej.net/>).

10

#### 11 *Simulations*

12 All simulations were performed using Morpheus 1.9.3 software ([https://imc.zih.tu-](https://imc.zih.tu-dresden.de/wiki/morpheus)  
13 [dresden.de/wiki/morpheus](https://imc.zih.tu-dresden.de/wiki/morpheus)). The time dependence of the Vg concentration was modeled by means  
14 of an ordinary differential equation for each cell (Fig. 2A), and the tissue was modeled by a Cellular  
15 Pots Model (CPM). Examples of the .xml files used to perform simulations are provided as  
16 supplementary files.

17

#### 18 *Image processing and data visualization*

19 All the images were processed and analyzed using ImageJ/Fiji software, the matplotlib  
20 (<https://matplotlib.org/>), pandas (<https://pandas.pydata.org/>), and NumPy (<http://www.numpy.org/>)  
21 python packages. The data, after being analyzed, were visualized with the seaborn  
22 (<https://seaborn.pydata.org/>) and Matplotlib python packages.

23

#### 24 **Acknowledgments**

25

26 We thank Fanis Missirlis for critical comments on the manuscript. We also thank Nahmad and  
27 Chara labs' members for interesting discussions.

28

1 **Competing interests**

2

3 No competing interests declared.

4

5 **Funding**

6

7 This work was funded by Consejo Nacional de Ciencia y Tecnología of Mexico, CB-2014-01-  
8 236685 to M. N. and by a grant from Agencia Nacional de Promoción Científica y Tecnológica,  
9 PICT-2014-3469 to O. C. L. M. M-N. and M. F-F. are supported by CONACyT (graduate  
10 scholarship program). O.C. is a career researcher from Consejo Nacional de Investigaciones  
11 Científicas y Técnicas of Argentina.

12

13 **References**

14

15 **Alexandre, C., Baéna-López, A. and Vincent J.P.** (2014). Patterning and growth control by  
16 membrane-tethered Wingless. *Nature* **505**, 180-185.

17

18 **Akaike, H.** (1974). A New Look at the Statistical Model Identification. *IEEE Trans. Automat.*  
19 *Contr.* **19**, 716–723.

20

21 **Averbukh, I., Ben-Zvi, D., Mishra, S. and Barkai, N.** (2014). Scaling morphogen gradients  
22 during tissue growth by a cell division rule. *Development* **141**, 2150–2156.

23

24 **Baena-López, L. A. and García-Bellido, A.** (2003). Genetic requirements of vestigial in the  
25 regulation of *Drosophila* wing development. *Development* **130**, 197–208.

26

27 **Baena-Lopez, L. A. and García-Bellido, A.** (2006). Control of growth and positional information  
28 by the graded vestigial expression pattern in the wing of *Drosophila melanogaster*. *Proc. Natl.*  
29 *Acad. Sci.* **103**, 13734–13739.

30

- 1 **Beira, J. V. and Paro, R.** (2016). The legacy of *Drosophila* imaginal discs. *Chromosoma* **125**, 573–  
2 592.  
3
- 4 **Brand, A. H. and Perrimon, N.** (1993). Targeted gene expression as a means of altering cell fates  
5 and generating dominant phenotypes. *Development* **118**, 401–415.  
6
- 7 **Bryant, S. V. and Gardiner, D. M.** (2016). The relationship between growth and pattern  
8 formation. *Regeneration* **3**, 103–122.  
9
- 10 **Day, S. J. and Lawrence, P. A.** (2000). Measuring dimensions: the regulation of size and shape.  
11 *Development* **127**, 2977–2987.  
12
- 13 **Dekanty, A. and Milán, M.** (2011). The interplay between morphogens and tissue growth. *EMBO*  
14 *Rep.* **12**, 1003–1010.  
15
- 16 **Fagman, H., Andersson, L. and Nilsson, M.** (2006). The developing mouse thyroid: Embryonic  
17 vessel contacts and parenchymal growth pattern during specification, budding, migration, and  
18 lobulation. *Dev. Dyn.* **235**, 444–455.  
19
- 20 **Graner, F. and Glazier, J. A.** (1992). Simulation of biological cell sorting using a two-  
21 dimensional extended Potts model. *Phys. Rev. Lett.* **69**, 2013–2016.  
22
- 23 **Glazier, J. A. and Graner, F.** (1993). Simulation of the differential adhesion driven rearrangement  
24 of biological cells. *Phys. Rev. E* **47**, 2128–2154.  
25
- 26 **Hariharan, I. K. and Bilder, D.** (2006). Regulation of Imaginal Disc Growth by Tumor-  
27 Suppressor Genes in *Drosophila*. *Annu. Rev. Genet.* **40**, 335–361.  
28
- 29 **Heberlein, U., Singh, C. M., Luk, A. Y. and Donohoe, T. J.** (1995). Growth and differentiation in  
30 the *Drosophila* eye coordinated by hedgehog. *Nature* **373**, 709–711.  
31



- 1 **Halder, G., Polaczyk, P., Kraus, M. E., Hudson, A., Kim, J., Laughon, A. and Carroll, S.**  
2 (1998). The Vestigial and Scalloped proteins act together to directly regulate wing-specific gene  
3 expression in *Drosophila*. *Genes Dev.* **12**, 3900–3909.  
4
- 5 **Irvine, K. D. and Vogt, T. F.** (1997). Dorsal-ventral signaling in limb development. *Curr. Opin.*  
6 *Cell Biol.* **9**, 867–876.  
7
- 8 **Kim, J., Sebring, A., Esch, J. J., Kraus, M. E., Vorwerk, K., Magee, J. and Carroll, S. B.**  
9 (1996). Integration of positional signals and regulation of wing formation and identity by  
10 *Drosophila* vestigial gene. *Nature* **382**, 133–138.  
11
- 12 **Lander, A. D.** (2011). Pattern, growth, and control. *Cell* **144**, 955–969.  
13
- 14 **Lindström, N. O., De Sena Brandine, G., Tran, T., Ransick, A., Suh, G., Guo, J., Kim, A. D.,**  
15 **Parvez, R. K., Ruffins, S. W., Rutledge, E. A., et al.** (2018). Progressive Recruitment of  
16 Mesenchymal Progenitors Reveals a Time-Dependent Process of Cell Fate Acquisition in Mouse  
17 and Human Nephrogenesis. *Dev. Cell* **45**, 651–660.  
18
- 19 **Milán, M., Campuzano, S. García-Bellido, A.** (1997). Developmental parameters of cell death in  
20 the wing disc of *Drosophila*. *Proc Natl Acad Sci U S A* **94**, 5691–5696.  
21
- 22 **Mao, Y., Tournier, A. L., Hoppe, A., Kerster, L., Thompson, B. J. and**  
23 **Tapon, N.** (2013). Differential proliferation rates generate patterns of mechanical tension that orient  
24 tissue growth. *EMBO J.* **32**, 2790–2803.  
25
- 26 **Metropolis, N., Rosenbluth, A. W., Rosenbluth, M.N., Teller, A. H. and Teller, E.** (1953).  
27 Equation of state calculations by fast computing machines. *J. Chem. Phys.* **21**, 1087–1092.  
28
- 29 **Pérez, L., Barrio, L., Cano, D., Fiuza, U. M., Muzzopappa, M. and Milán, M.** (2011).  
30 Enhancer-PRE communication contributes to the expansion of gene expression domains in  
31 proliferating primordia. *Development* **138**, 3125–3134.  
32

1 **Schwank, G. and Basler, K.** (2010). Regulation of Organ Growth by Morphogen Gradients. *Cold*  
2 *Spring Harb. Perspect. Biol.* **2**, a001669–a001669.

3

4 **Schwank, G., Tauriello, G., Yagi, R., Kranz, E., Koumoutsakos, P. and**  
5 **Basler, K.** (2011). Antagonistic growth regulation by Dpp and Fat drives uniform cell  
6 proliferation. *Dev. Cell* **20**, 123–130.

7

8 **Starruß, J., de Back, W., Brusch, L. and Deutsch, A.** (2014). Morpheus: a user-friendly  
9 modeling environment for multiscale and multicellular systems biology. *Bioinformatics* **30**, 1331–  
10 1332.

11

12 **Strutt, D.I., Wiersdorff, V. and Mlodzik, M.** (1995). Regulation of furrow progression in the  
13 *Drosophila* eye by cAMP-dependent protein kinase A. *Nature* **373**, 705–709.

14

15 **Sui, L., Pflugfelder, G.O. and Shen, J.** (2012). The Dorsocross T-box transcription factors  
16 promote tissue morphogenesis in the *Drosophila* wing imaginal disc. *Development* **139**, 2773–2782.

17

18 **Vollmer, J., Casares, F. and Iber, D.** (2017). Growth and size control during development. *Open*  
19 *Biol.* **7**, 170190.

20

21 **Wartlick, O., Mumcu, P., Kicheva, A., Bittig, T., Seum, C., Julicher, F. and González-Gaitán,**  
22 **M.** (2011). Dynamics of Dpp Signaling and Proliferation Control. *Science* **331**, 1154–1159.

23

24 **Williams, J. A, Bell, J. B. and Carroll, S. B.** (1991). Control of *Drosophila* wing and haltere  
25 development by the nuclear vestigial gene product. *Genes Dev.* **5**, 2481–2495.

26

27 **Williams, J. A, Paddock, S. W. and Carroll, S. B.** (1993). Pattern formation in a secondary field:  
28 a hierarchy of regulatory genes subdivides the developing *Drosophila* wing disc into discrete  
29 subregions. *Development* **117**, 571–584.

30

- 1 **Williams, J. A., Paddock, S. W., Vorwerk, K. and Carroll, S. B.** (1994). Organization of wing  
2 formation and induction of a wing-patterning gene at the dorsal/ventral compartment boundary.  
3 *Nature* **368**, 299–305.  
4
- 5 **Wortman, J. C., Nahmad, M., Zhang, P. C., Lander, A. D. and Yu, C. C.** (2017). Expanding  
6 signal-molecule wavefront model of cell polarization in the *Drosophila* wing primordium. *PLoS*  
7 *Comput. Biol.* **13**, e1005610.  
8
- 9 **Wu, S., Liu, Y., Zheng, Y., Dong, J. and Pan, D.** (2008). The TEAD/TEF family protein  
10 Scalloped mediates transcriptional output of the Hippo growth-regulatory pathway. *Dev. Cell* **14**,  
11 388-398.  
12
- 13 **Yu, F. X., Zhao, B. and Guan, K. L.** (2015). Hippo pathway in organ size control, tissue  
14 homeostasis and cancer. *Cell* **163**, 811-828.  
15
- 16 **Zecca, M. and Struhl, G.** (2007a). Recruitment of cells into the *Drosophila* wing primordium by a  
17 feed-forward circuit of vestigial autoregulation. *Development* **134**, 3001–3010.  
18
- 19 **Zecca, M. and Struhl, G.** (2007b). Control of *Drosophila* wing growth by the vestigial quadrant  
20 enhancer. *Development* **134**, 3011–3020.  
21
- 22 **Zecca, M. and Struhl, G.** (2010). A feed-forward circuit linking wingless, fat-dachsous signaling,  
23 and the warts-hippo pathway to *Drosophila* wing growth. *PLoS Biol.* **8**, e1000386.  
24
- 25 **Zeidler, M. P., Tan, C., Bellaïche, Y., Cherry, S., Häder, S., Gayko, U. and Perrimon, N.**  
26 (2004). Temperature-sensitive control of protein activity by conditionally splicing inteins. *Nat.*  
27 *Biotechnol.* **22**, 871–876.

## 1 Figures and Figure Legends

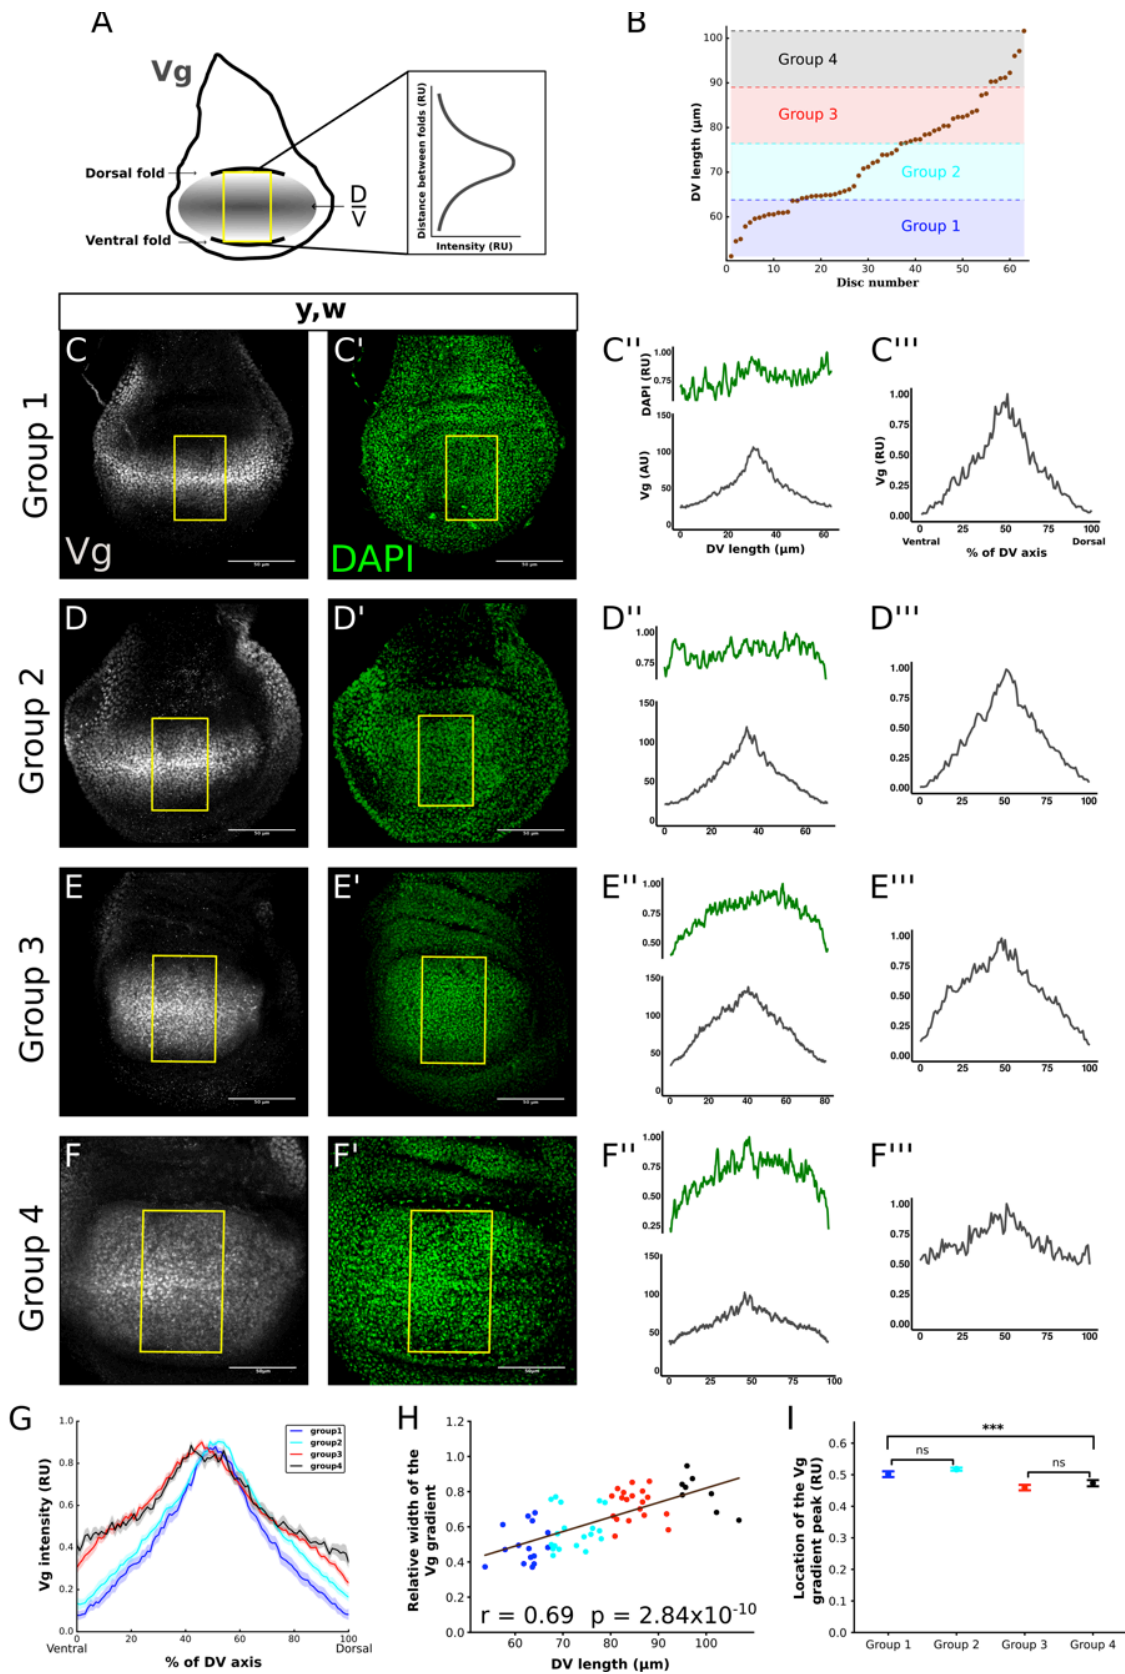

1 **Figure 1. Spatio-temporal quantification of Vg along the DV axis in third-instar wing discs**  
2 **reveals overscaling of the Vg pattern to size.** (A) Cartoon depicting the region within the wing  
3 pouch where the quantification of the Vg pattern was performed (yellow rectangle). This  
4 rectangular region is centered in the anterior posterior border of the disc and is delimited by the  
5 ventral and dorsal folds that separate the pouch from the hinge (throughout the paper, we use the  
6 distance between these folds as a measure of disc size). The intensity of Vg in each vertical line of  
7 pixels within the rectangle is averaged to obtain a spatial Vg expression along the DV axis. (B)  
8 Third-instar (ages 85-120 h After Egg Laying (AEL) at 25°C) yellow-white (*y, w*) discs (throughout  
9 the study, we refer to *y, w* discs as wild type) are classified into four groups according to the  
10 distance between dorsal and ventral folds (DV length). The groups are defined by dividing the  
11 shortest to the longest DV length into four intervals of equal length. (C-F) Representative images of  
12 discs within each group immunostained with a Vg antibody (C-F) and DAPI (C'-F') and the  
13 quantification of the Vg patterns in the region defined in A in absolute (C''-F'') and relative (C'''-  
14 F''') units (AU and RU, respectively). (In C''-F'', the quantification of DAPI patterns (green curves  
15 in the plots on the top of each panel) in RU are shown to indicate that disc geometry could affect the  
16 intensity levels close to the folds, especially in Group 3 and Group 4 discs). The quantifications of  
17 the Vg patterns in C'''-F''' are normalized to DAPI levels (see Supplemental Information and Fig.  
18 S1). (G) Mean of the normalized Vg profiles (dark line) and Standard Error of the Mean (SEM,  
19 shaded area) from all the discs in each group (n=15, 21, 19 and 8 for Groups 1, 2, 3, and 4,  
20 respectively). (H) Relative width of the Vg gradient (defined as the width of the Vg pattern in RU at  
21 0.5 divided by DV length) as a function of DV length; each dot in the graph corresponds to a  
22 different disc and is color-coded as in G. The solid line shows the linear regression of the data and  
23 the Pearson Correlation Coefficient,  $r$ , of the regression is displayed. The p-value corresponds to a  
24 Student-t statistical test assuming a zero-slope of the regression line as a null hypothesis. (Note that  
25 a positive slope corresponds to overscaling; a zero-slope, *i.e.*, when the null hypothesis cannot be  
26 rejected, corresponds to perfect scaling; whereas a negative slope corresponds to underscaling). (I)  
27 Comparison of the location of the Vg gradient peak in RU for the discs in each group; error bars  
28 correspond to the SEM. (Statistical significance is analyzed using a Kruskal-Wallis non-parametric  
29 test; \*\*\*, p-value<10<sup>-5</sup>. Pairwise statistical comparisons between groups 1 and 2, and groups 3 and 4  
30 using a Mann-Whitney non-parametric test reveal non-statistical differences between these groups;  
31 ns, p-value<0.01).

32

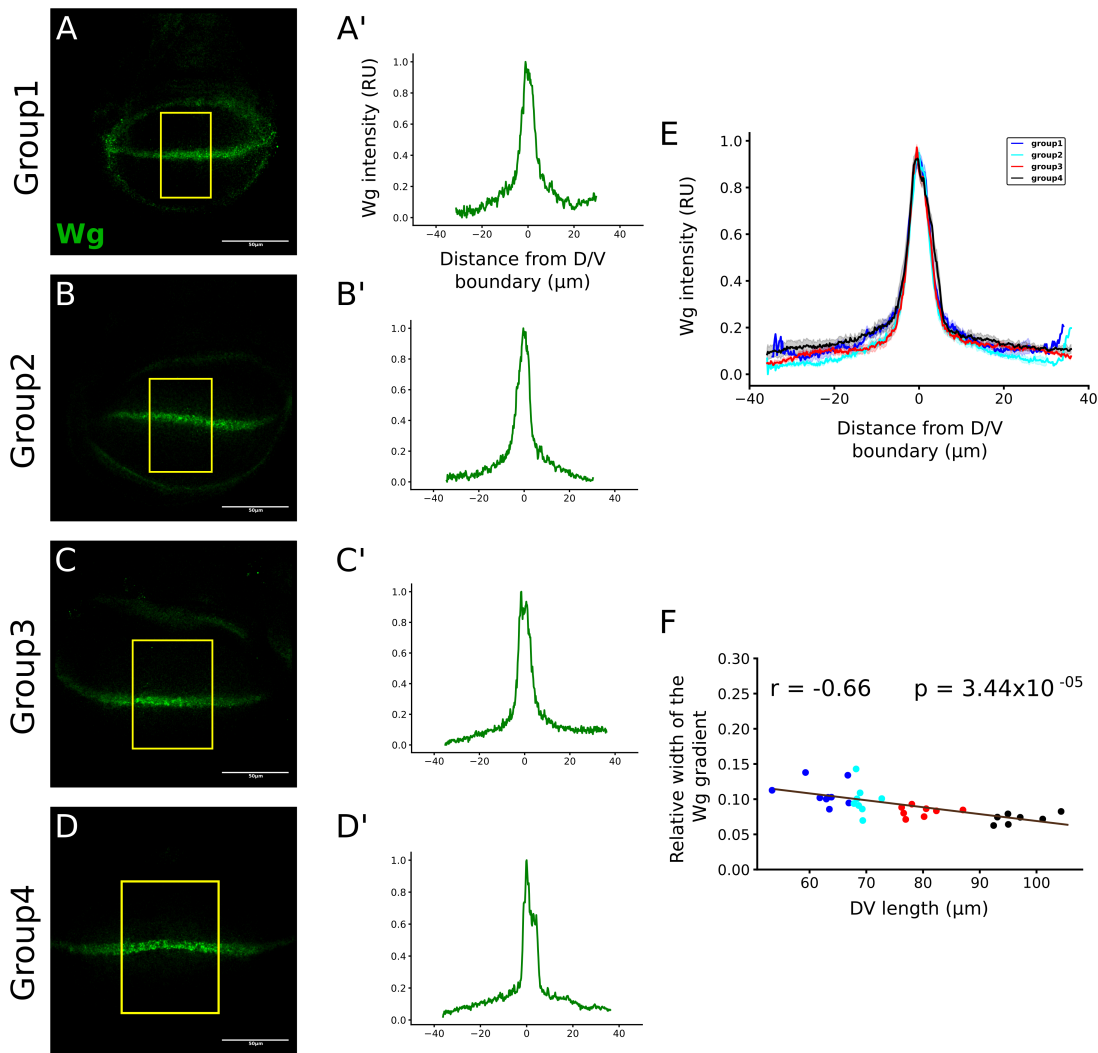

1

2 **Figure 2. The pattern of the Wg morphogen underscales to disc size along the DV axis in wild-**  
3 **type discs.** (A-D) Representative images of discs within each group immunostained with a Wg  
4 antibody (A-D) and the quantification of the gradients by horizontally averaging in the region  
5 defined by the yellow rectangles (A'-D'). (E) Mean of the normalized Wg profiles (dark line) and  
6 Standard Error of the Mean (SEM, shaded area) from all the discs in each group (n=9, 8, 8 and 7 for  
7 Groups 1, 2, 3, and 4, respectively). Note that unlike Fig. 1G, the units of the horizontal axis are of  
8 absolute distance to the DV boundary in order to show that the pattern does not expand significantly  
9 despite that the discs are growing, an indication of underscaling behavior. (F) Relative width of the  
10 Wg gradient (defined as the width of the Vg pattern in RU at 0.5 divided by DV length) as a  
11 function of DV length; each dot in the graph corresponds to a different disc and is color-coded as in  
12 E. The solid line shows the linear regression of the data and the Pearson Correlation Coefficient, r,  
13 of the regression is displayed. The p-value corresponds to a Student-t statistical test assuming a  
14 zero-slope of the regression line as a null hypothesis.

1

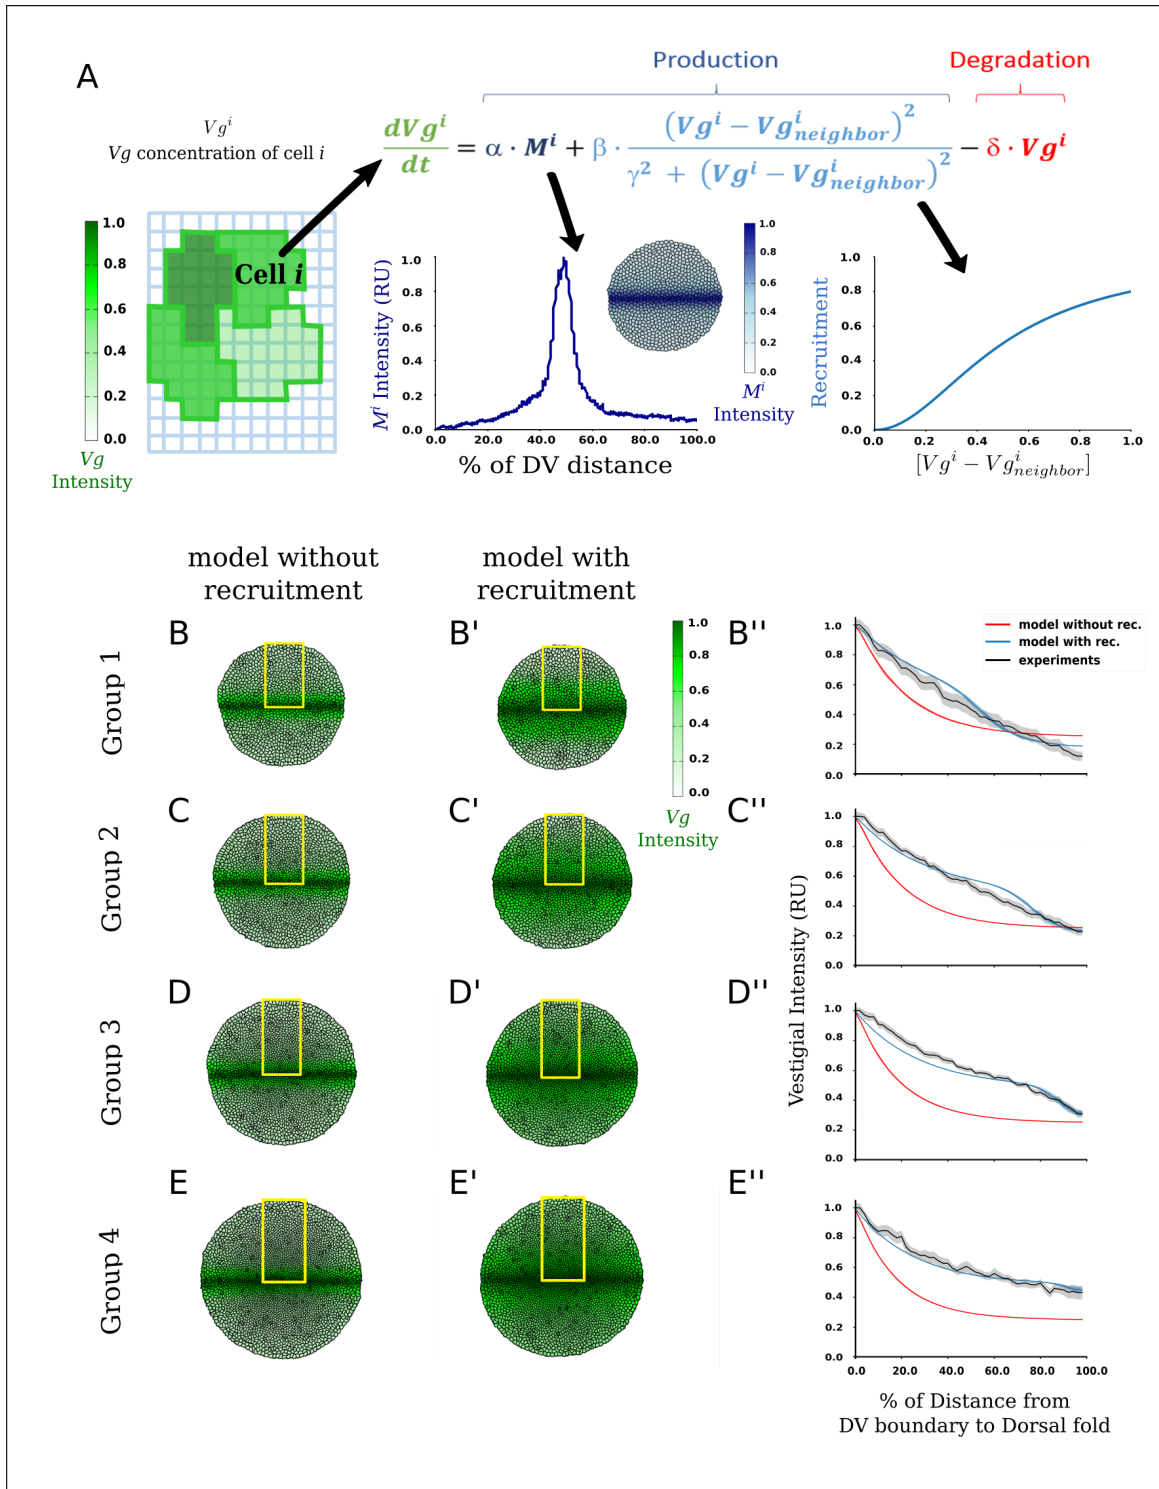

2

3 **Figure 3. Multi-scale mathematical modeling with recruitment recapitulates Vg overscaling.**

4 (A) Outline of the model (see text and Supplemental Information for further details). The dynamics



1 of Vg concentration in each cell is given by an ordinary differential equation including: a spatial-  
2 dependent production (first term) that models the concentration-dependent effect of a morphogen M  
3 (the representative profile shown corresponds to the experimental pattern of Wg in a representative  
4 disc), our formulation of the recruitment mechanism (second term) that depends on a Hill function  
5 of the difference in Vg concentration between the actual cell and the average of its neighbors, and  
6 linear degradation (third term). As a control, we considered a model without the recruitment term.  
7 (B-E) Simulated tissues showing Vg profiles of the model without the recruitment term (B-E), and  
8 with the recruitment term (B'-E') at four different simulated times corresponding to the average  
9 pouch areas of discs in Groups 1-4. (B''-E'') Simulated patterns of Vg in the dorsal compartment  
10 (obtained by horizontally averaging the simulated Vg patterns within the yellow rectangles in B-E  
11 and B'-E') from the model with (blue curves) or without (red curves) the recruitment term, using  
12 parameter values that best fit the average experimental Vg profiles (black curves) in Groups 1-4.  
13

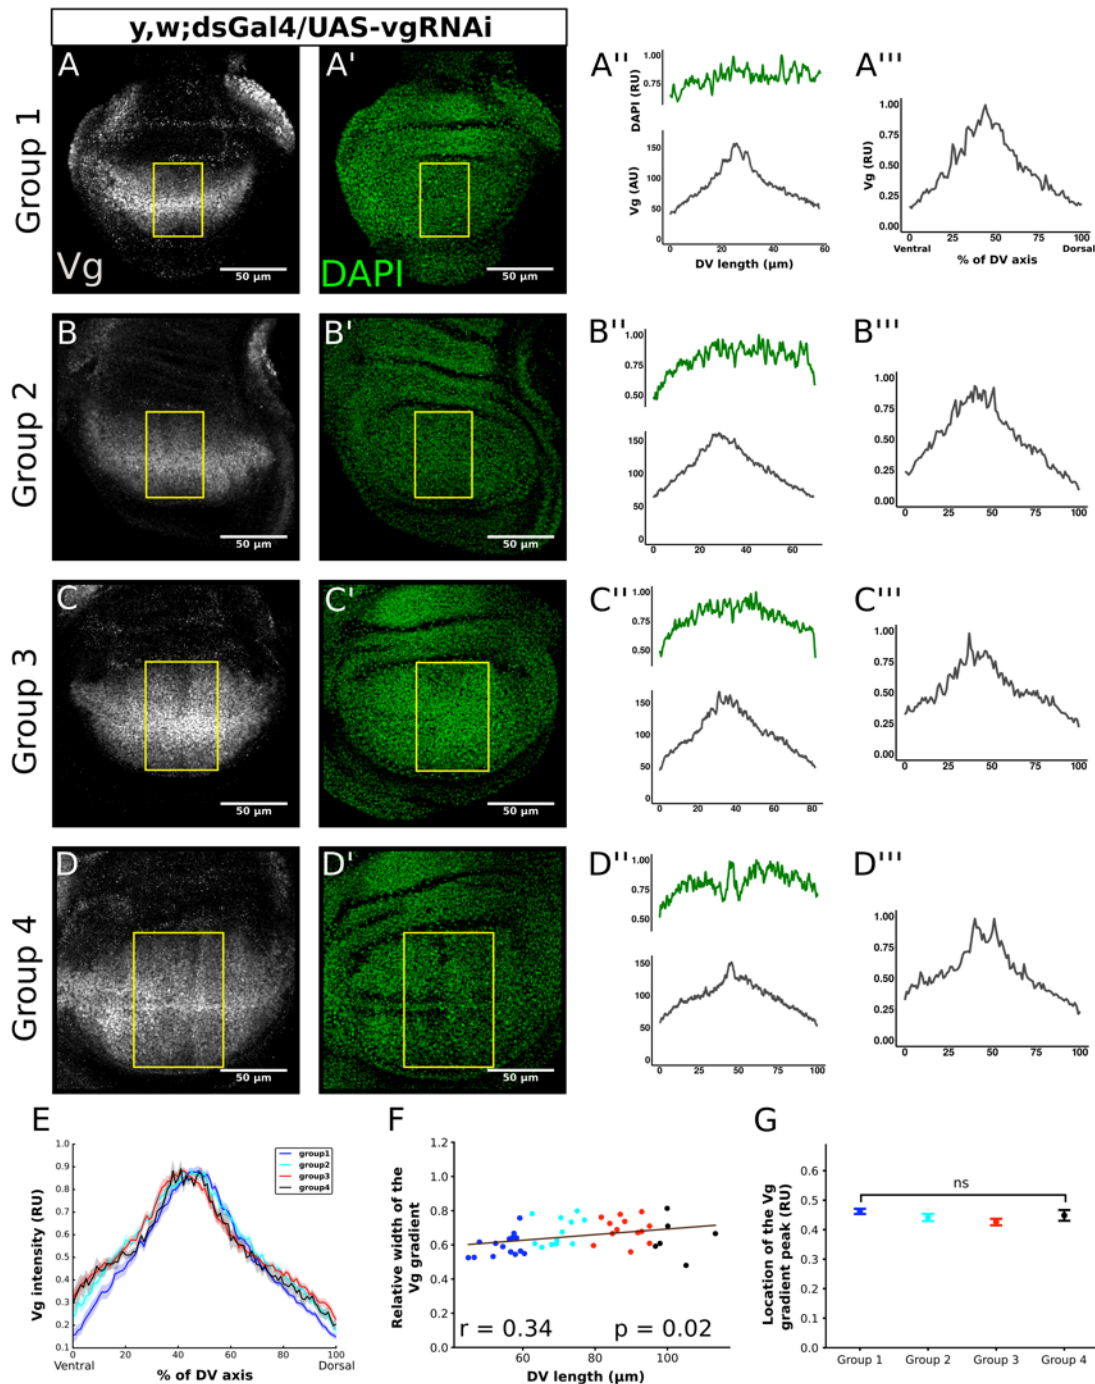

1

2 **Figure 4. Genetic impairment of cell recruitment by  $ds>vg^{RNAi}$  results in almost perfect scaling**  
 3 **of the Vg pattern.** (A-D) Representative images of third-instar wing discs in which cell recruitment  
 4 was blocked by expressing  $vg^{RNAi}$  in the domain of  $ds$  using the Gal4-UAS system. The discs were  
 5 classified in four groups according to their DV length as defined in Fig. 1B. Discs immunostained  
 6 with a Vg antibody (A-D) and DAPI (A'-D') and the quantification of the Vg patterns in a

1 rectangular region defined as in Fig. 1A in AU (A''-D'') and RU (A'''-D''') units as in Fig. 1. The  
2 quantifications of the Vg patterns in A'''-D''' are normalized to DAPI levels. (E) Median of the  
3 normalized Vg profiles (dark line) and SEM (shaded area) from all the discs in each group (n=15,  
4 12, 13 and 6 for Groups 1, 2, 3, and 4, respectively). (F) Relative width of the Vg gradient (as  
5 defined in Fig. 1H) as a function of DV length; each dot in the graph corresponds to a different disc  
6 and is color-coded as in E. The solid line shows the linear regression of the data and the Pearson  
7 Correlation Coefficient,  $r$ , of the regression is displayed. The p-value corresponds to a Student-t  
8 statistical test assuming a zero-slope of the regression line as a null hypothesis. (G) Comparison of  
9 the location of the Vg gradient peak in RU for the discs in each group; error bars correspond to the  
10 SEM. (Statistical significance is analyzed using a Kruskal-Wallis non-parametric test; ns, p-  
11 value=0.075).

12

13

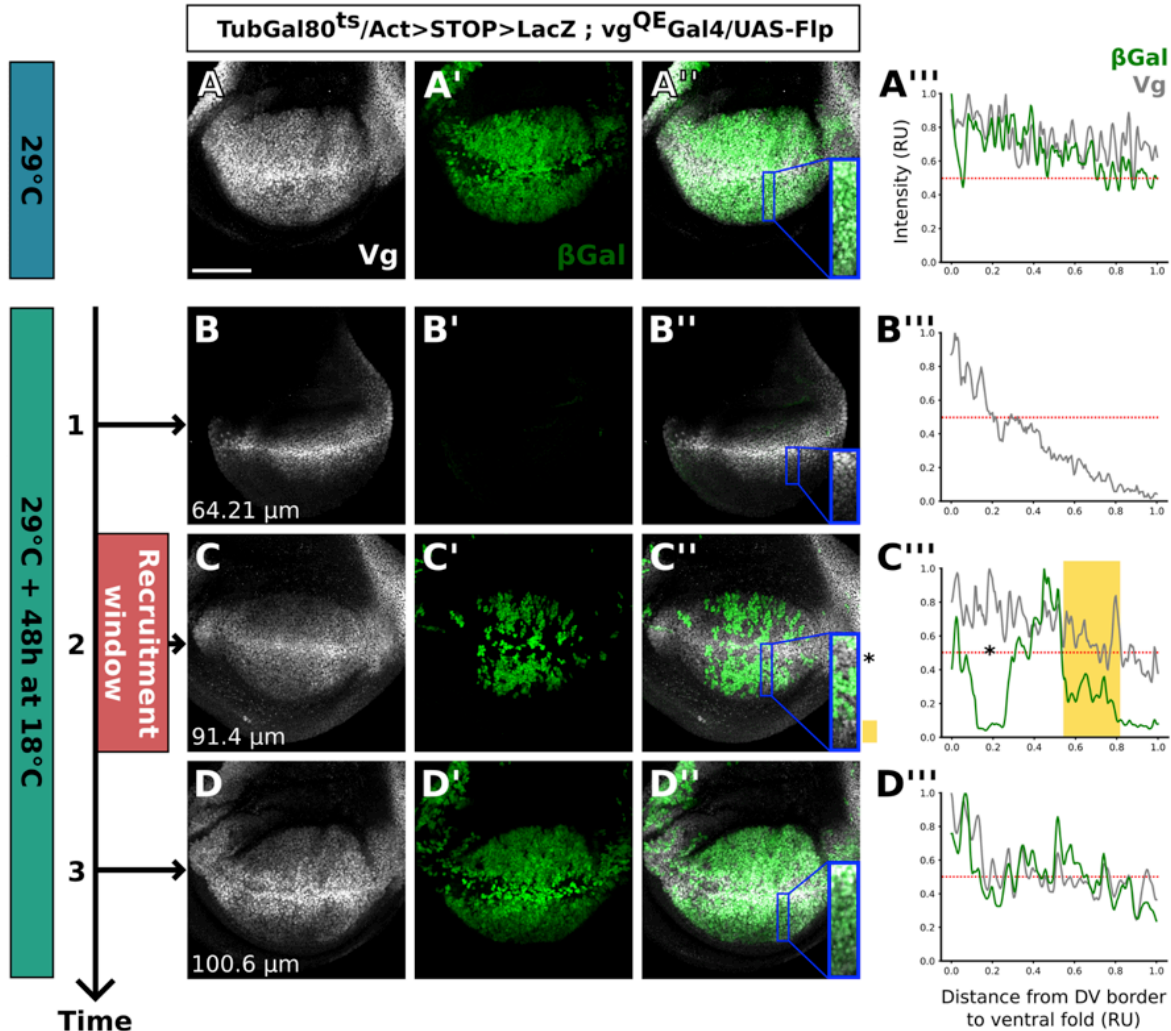

1

2 **Figure 5. Lineage tracing of  $vg^{QE}$ -expressing cells labeled by  $\beta$ Galactosidase ( $\beta$ Gal) expression**

3 **and temporally modulated by Gal80<sup>ts</sup>. (A-A'', B-B'', C-C'')** Third instar wing discs

4 immunostained with Vg antibody (A-D) and in which the lineage of  $vg^{QE}$ -expressing cells is

5 conditionally-marked (using Gal80<sup>ts</sup>) with  $\beta$ Gal (A'-D'). At 29 °C, Gal80<sup>ts</sup> is not functional and all

6 cells under the control of  $vg^{QE}$  and their progeny should express  $\beta$ Gal, whereas at 18 °C, Gal80<sup>ts</sup>

7 represses  $\beta$ Gal expression. Temperature was kept at 29 °C throughout development (A-A''; positive

8 control), or was changed to 18 °C for the last 48 hours before dissection of mid (B-B''), mid-late

9 (C-C''), or late third instar larvae (D-D''). The distance between folds is depicted in the lower left

10 corner in panels B, C, and D. (A''', B''', C''', D''') Normalized profiles of the Vg and  $\beta$ Gal

11 patterns in the blue rectangle area showed in A'', B'', C'', and D'', respectively. The red dotted line

12 at 0.5 of normalized intensity serves to define which cells were recruited (yellow shaded area). Note

13 that the region in C'' and C''' marked with an asterisk represents a region within the  $vg^{BE}$  and

14 cannot be considered as recruited cells. These data suggest that no recruitment is detected before the

1 beginning of the third instar (1) or later than mid third instar (3); we conclude that recruitment takes  
2 place in a specific window of time (red box on left), estimated between early and mid instar larval  
3 development (2).

4

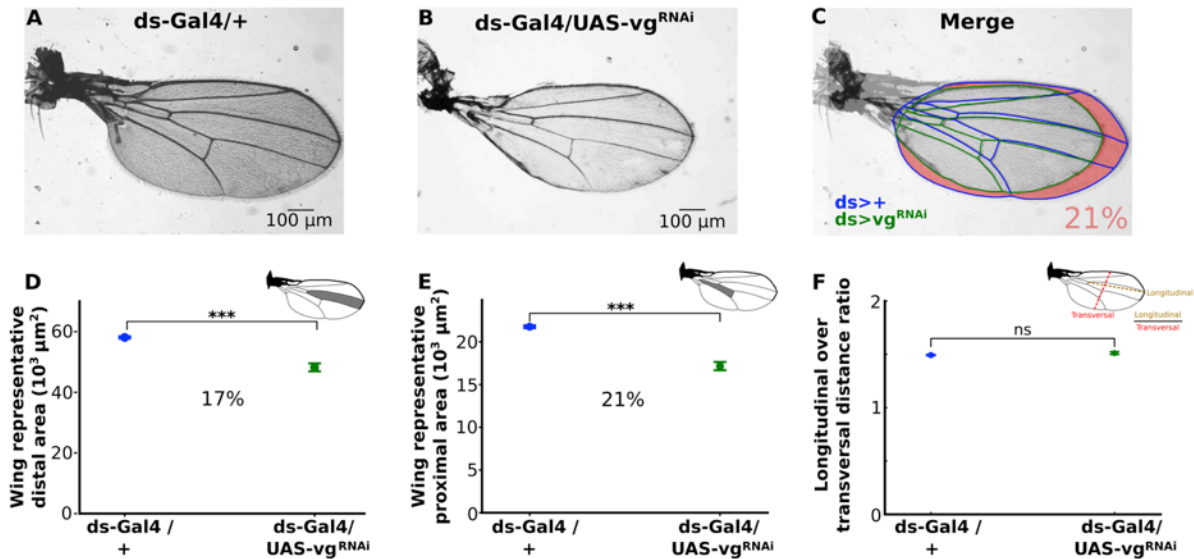

5

6

7 **Figure 6. Genetic impairment of cell recruitment results in proportionally smaller adult**

8 **wings.** (A and B) Representative adult wings of *ds>vg<sup>RNAi</sup>* (A) and *dsGal4/+* (control, B) animals.

9 (C) Merged wings shown in A (veins and margin colored in blue) and B (veins and margin colored  
10 in green). The area difference is shaded in pink. On average, control wings are 21% smaller than

11 when recruitment is impaired. (D, E) Comparison of representative (see insets) distal (D) and  
12 proximal (E) areas in *dsGal4/+* vs. *ds>vg<sup>RNAi</sup>* wings. (Average percentage of reduction is shown,  
13 statistical significance is analyzed using a Mann-Whitney non-parametric test; \*\*\*, p-value < 10<sup>-5</sup>).

14 (F) Comparison of the ratio of longitudinal to transversal distance in *dsGal4/+* vs. *ds>vg<sup>RNAi</sup>* wings  
15 (Statistical significance is analyzed using a Mann-Whitney non-parametric test; ns, p-value < 0.01).
